# Supplementary figures and images for: Lactobacillus plantarum SHY130 isolated from yak yogurt attenuates hyperglycemia in C57BL/6J mice by regulating the enteroinsular axis
Source: Royal Society of Chemistry journal article supplement (doi:10.1039/d1fo02387j), 2021-11-22

### Supplementary Figure 1

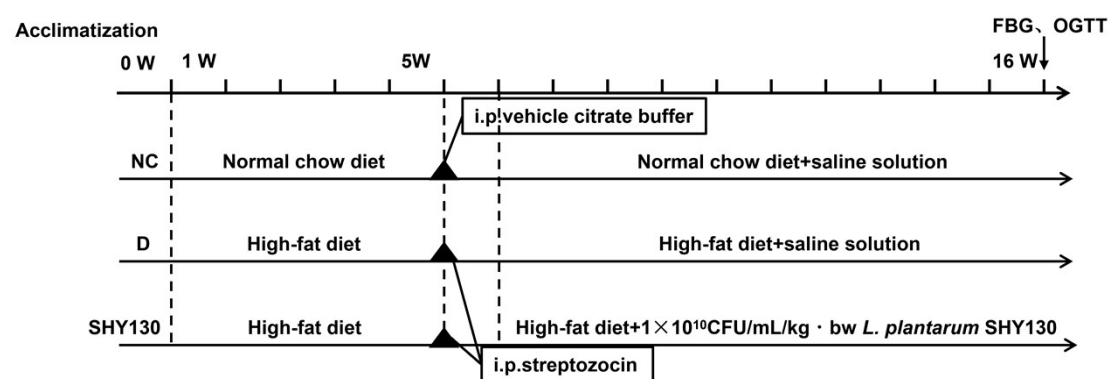

Supplementary Figure 2

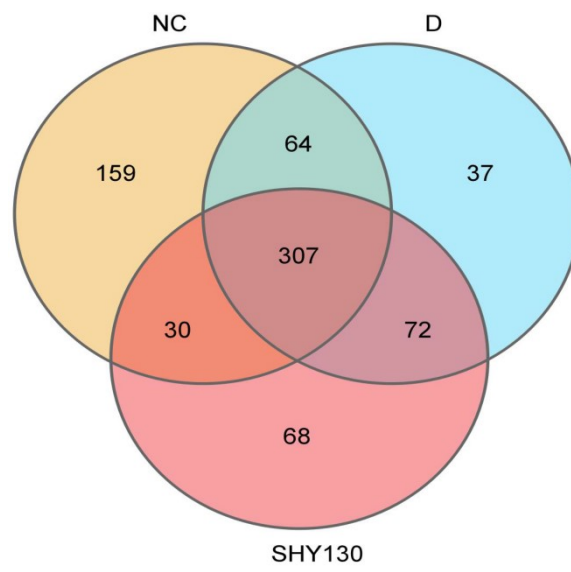

Supplement: d1fo02387j1.pdf [file d1fo02387j1.pdf]
